# Supplementary material for: Winter Activity of Podarcis muralis (Laurenti, 1768) and P. erhardii (Bedriaga, 1876) in Urban and Suburban Habitats in the City of Blagoevgrad, Bulgaria
Source: Preprints.org preprint supplement (doi:10.20944/preprints202309.0656.v1), 2023-09-11
Supplement: Supplementary file 2 [file Table S2 P_ erhardi.docx]

Table S2: *Podarcis erhardii*

| **Date of observation** | **Time of observation** | **Number of individuals observed** | **Age groups** | | | **Behaviour**  locomotor activity (la), basking (b), fight between two males (f) | **Flattened body while basking** | **Environmental conditions** | **Temperature at the time of observation, °C** | | **Minimum night/morning temperature, °C** |
| --- | --- | --- | --- | --- | --- | --- | --- | --- | --- | --- | --- |
| **Ad.** | **Subad.** | **Juv.** | **Air temperature** | **Substrate temperature** |
| First winter: | | | | | | | | | | | |
| 13.12.2015 | 12:20 p.m. | 3 | + | - | - | la and b | 1 | sunny | 5 | 26 | -4.5 |
| 24.12.2015 | 3:00 p.m. | 1 | + | - | - | b | - | sunny | 9.5 | 32 | -1 |
| 26.12.2015 | 2:00 p.m. | 1 | + | - | - | la | - | sunny | 8.5 | 29.5 | -1.5 |
| 29.12.2015 | 1:15 p.m. | 4 | + | - | - | la and f | - | sunny | 8 | 29 | -2.5 |
| 09.01.2016 | 2:30 p.m. | 0 | - | - | - | - | - | cloudy | 12 | 8 | -1.5 |
| 11.01.2016 | 11:50 a.m. | 2 | + | - | - | b | - | sunny | 15 | 26 | 4 |
| 13.01.2016 | 3:00 p.m. | 2 | + | - | - | b | - | sunny | 8 | 17.5 | 2 |
| 14.01.2016 | 4:00 p.m. | 2 | + | - | - | b | - | sunny | 8.5 | 27.5 | -1 |
| 22.01.2016 | 2:30 p.m. | 0 | - | - | - | - | - | sunny | -2.5 | 22.5 | -8.5 |
| 23.01.2016 | 3:00 p.m. | 0 | - | - | - | - | - | sunny | -6.5 | 21 | -14.5 |
| 30.01.2016 | 3:15 p.m. | 7 | + | - | - | la and b | 1 | sunny | 12 | 32.5 | 0 |
| 03.02.2016 | 1:50 p.m. | 6 | + | - | - | la and f | - | sunny with light wind | 19.5 | 35.5 | 5.5 |
| 06.02.2016 | 2:40 p.m. | 4 | + | - | - | la, b and f | - | sunny | 4.5 | 28 | -1 |
| 08.02.2016 | 2:15 p.m. | 3 | + | - | 1 | la and b | - | sunny with light wind | 9 | 29.5 | -3 |
| 14.02.2016 | 1:30 p.m. | 7 | + | 1 | - | la and b | - | sunny with moderate wind | 17 | 26.5 | 5.5 |
| 15.02.2016 | 1:45 p.m. | 12 | + | 2 | 2 | la and f | - | sunny with moderate wind | 18 | 32.5 | 13 |
| Second winter: | | | | | | | | | | | |
| 03.12.2016 | 1:35 p.m. | 5 | + | - | 1 | b | - | sunny | 5 | 31 | -1 |
| 04.12.2016 | 1:45 p.m. | 1 | + | - | - | b | - | sunny | 1.5 | 21 | -6 |
| 05.12.2016 | 2:15 p.m. | 2 | + | - | - | b | - | sunny | 4 | 29 | -3.5 |
| 06.12.2016 | 2:00 p.m. | 1 | + | - | - | b | - | partly cloudy | 5.5 | 25.5 | -2 |
| 08.12.2016 | 2:30 p.m. | 0 | - | - | - | - | - | sunny | 2 | 22 | -6.5 |
| 09.12.2016 | 3:00 p.m. | 0 | - | - | - | - | - | sunny | 6 | 26 | -5.5 |
| 10.12.2016 | 1:30 p.m. | 2 | + | - | 1 | la | - | sunny | 9.5 | 34.5 | -4 |
| 11.12.2016 | 1:20 p.m. | 1 | + | - | - | b | - | sunny | 7.5 | 30 | -3 |
| 12.12.2016 | 12:05 p.m. | 2 | + | - | - | b | - | sunny with moderate wind | 8 | 31.5 | -2 |
| 13.12.2016 | 1:45 p.m. | 2 | + | - | - | b | - | sunny with light wind | 1 | 33 | -4 |
| 14.12.2016 | 1:15 p.m. | 1 | + | - | - | b | - | sunny | 0.5 | 34 | -8.5 |
| 16.12.2016 | 2:30 p.m. | 0 | - | - | - | - | - | partly cloudy | 4 | 30 | -0.5 |
| 17.12.2016 | 1:00 p.m. | 0 | - | - | - | - | - | sunny | -0.5 | 32 | -6 |
| 18.12.2016 | 1:30 p.m. | 0 | - | - | - | - | - | partly cloudy | 1.5 | 23 | -8 |
| 19.12.2016 | 12:15 p.m. | 0 | - | - | - | - | - | sunny | -1 | 35.5 | -8 |
| 20.12.2016 | 1:00 p.m. | 1 | + | - | - | la | - | sunny | 2.5 | 41 | -8 |
| 21.12.2016 | 1:30 p.m. | 1 | + | - | - | b | - | sunny | 3 | 41 | -4.5 |
| 23.12.2016 | 12:15 p.m. | 0 | - | - | - | - | - | sunny | 6.5 | 40 | -4 |
| 24.12.2016 | 1:00 p.m. | 0 | - | - | - | - | - | sunny | 0.5 | 33 | -6.5 |
| 29.12.2016 | 1:15 p.m. | 0 | - | - | - | - | - | sunny | 0 | 25.5 | -2 |
| 02.01.2017 | 1:00 p.m. | 0 | - | - | - | - | - | sunny | -1 | 30 | -9 |
| 03.01.2017 | 1:00 p.m. | 0 | - | - | - | - | - | sunny | 1 | 31.5 | -8.5 |
| 15.01.2017 | 1:30 p.m. | 0 | - | - | - | - | - | sunny | -0.5 | 23 | -4 |
| 28.01.2017 | 1:30 p.m. | 0 | - | - | - | - | - | sunny | -0.5 | 29 | -10.5 |
| 30.01.2017 | 2:00 p.m. | 0 | - | - | - | - | - | sunny | 0.5 | 29.5 | -6.5 |
| 01.02.2017 | 2:45 p.m. | 1 | + | - | - | b | - | sunny | 6.5 | 33.5 | -1.5 |
| 02.02.2017 | 2:30 p.m. | 4 | + | 1 | - | la and b | - | sunny | 7 | 34 | -4 |
| 03.02.2017 | 3:30 p.m. | 3 | + | - | 1 | b | - | sunny | 11 | 27 | 1.5 |
| 05.02.2017 | 3:30 p.m. | 3 | + | - | - | b | - | partly cloudy | 13 | 13 | 5.5 |
| 09.02.2017 | 2:15 p.m. | 3 | + | 1 | - | b | - | sunny | 8.5 | 26.5 | 2 |
| 14.02.2017 | 4:00 p.m. | 2 | + | 1 | - | b | - | sunny | 4.5 | 32 | -6 |
| 27.02.2017 | 2:30 p.m. | 3 | + | - | - | la | - | sunny | 13.5 | 35 | 6 |
